# Supplementary material
Source: MDPI journal article supplement (https://www.mdpi.com/2073-4395/12/5/1189)
Supplement: s1 [file s1]

**Table S1. Test accuracy analysis in 2020 and 2021.**

| Year | Location | CV (%) | GCV (%) |
|------|----------|--------|---------|
| 2020 | Baoshan  | 2.694  | 5.946   |
|      | Binchuan | 9.458  | 2.162   |
|      | Chuxiong | 1.723  | 5.526   |
|      | Gengma   | 2.861  | 9.852   |
|      | Lijiang  | 4.082  | 6.491   |
|      | Mile     | 8.420  | 9.173   |
|      | Shilin   | 5.227  | 5.939   |
|      | Xuanwei  | 3.651  | 9.544   |
|      | Yanshan  | 4.198  | 5.211   |
|      | Zhaotong | 3.162  | 4.066   |
| 2021 | Baoshan  | 3.933  | 6.987   |
|      | Binchuan | 5.276  | 4.775   |
|      | Chuxiong | 6.046  | 3.181   |
|      | Gengma   | 6.422  | 8.354   |
|      | Lijiang  | 9.209  | 5.342   |
|      | Mile     | 6.046  | 2.778   |
|      | Shilin   | 4.046  | 5.756   |
|      | Xuanwei  | 3.016  | 9.365   |
|      | Yanshan  | 11.373 | 7.468   |
|      | Zhaotong | 2.691  | 6.300   |

Note: *CV*, coefficient of variation in each test; *GCV*, genetic coefficient of variation in each test.

**Table S2. Multiple comparison results by LSD method in two-year.**

| Hybrids  | Mean yield<br>(Kg Ha <sup>-1</sup> ) | Yield increased<br>over CK (%) | 0.05 level<br>significance | 0.01 level<br>significance |
|----------|--------------------------------------|--------------------------------|----------------------------|----------------------------|
| LD-18    | 12298.75                             | 20.16%                         | a                          | A                          |
| LD-19    | 11881.30                             | 16.08%                         | ab                         | AB                         |
| ZY-811   | 11879.31                             | 16.06%                         | ab                         | AB                         |
| LD-29    | 11803.81                             | 15.32%                         | abc                        | ABC                        |
| YY-1503  | 11628.30                             | 13.61%                         | bcd                        | ABCD                       |
| ZY-607   | 11614.21                             | 13.47%                         | bcd                        | ABCD                       |
| ZY-609   | 11579.90                             | 13.13%                         | bcd                        | ABCD                       |
| LX-1     | 11476.45                             | 12.12%                         | bcd                        | BCD                        |
| YY-1506  | 11467.17                             | 12.03%                         | bcd                        | BCD                        |
| JL-118   | 11401.64                             | 11.39%                         | bcde                       | BCD                        |
| DY-201   | 11311.01                             | 10.51%                         | cde                        | BCD                        |
| DY-502   | 11070.54                             | 8.16%                          | de                         | CD                         |
| DY-602   | 10854.75                             | 6.05%                          | e                          | DE                         |
| HH-2(CK) | 10235.71                             | 0.00%                          | f                          | E                          |

Note:  $LSD_{0.05} = 37.5351$ ,  $LSD_{0.01} = 52.2378$
